# Supplementary material
Source: PubMed Central journal article supplement (PMC9443721)
Supplement: NIHMS1831468-supplement-1.pdf [file NIHMS1831468-supplement-1.pdf]

## **Validation of an indirect linkage algorithm to combine registry data with Medicare claims**

### **Appendix – Supplemental methods**

#### **1. Details related to Medicare fee-for-service and Medicare advantage claims**

Medicare Fee-for-service (FFS) is administered by CMS while Medicare Advantage (MA) is administered by private insurance companies. Claims for FFS beneficiaries are processed by CMS and claims for MA beneficiaries are processed by these companies. Some of the claims of MA beneficiaries may get submitted to CMS during hospital/provider's administrative billing process. As a result, claims of MA beneficiaries may appear in FFS data, but would not be complete and cannot be used to estimate the matching rate. Therefore, MA beneficiaries were excluded from the denominator for the validation.

Enrollment in MA was 24% in 2010 and 35% in 2018 (1). This was consistent with our gold standard sample, in which 66% of patients (144,045 out of 217,640) were enrolled in FFS.

#### **Reference:**

1. Freed M, Damico A, and Neuman T. A Dozen Facts About Medicare Advantage in 2020. Kaiser Family Foundation. 2021.

## 2. Developmental tests of flexibility to be given to the indirect identifiers

During the developmental stage, we performed tests in EVAR (n=26656) and OAR (n=6188) datasets to determine the flexibility to be given to indirect identifiers. Our final choice was made by balancing the matching rate gained and the potential risk of increasing mismatch (reduced accuracy).

### Test 1: 5-digit vs. 3-digit zip code – use 3 digit zip code

|      |           | Matching criteria |     |           |          | EVAR (n=26656) |             |         |           | OAR (n=6188) |             |         |           |
|------|-----------|-------------------|-----|-----------|----------|----------------|-------------|---------|-----------|--------------|-------------|---------|-----------|
| Step | Center ID | DOB               | sex | Proc date | Zip code | Cum match      | % Cum match | Cum Acc | % Cum Acc | Cum match    | % Cum match | Cum Acc | % Cum Acc |
| 1    | x         | x                 | x   | x         | 5-digit  | 21512          | 80.7%       | 21237   | 98.7%     | 4726         | 76.4%       | 4644    | 98.3%     |
| 1    | x         | x                 | x   | x         | 3-digit  | 22298          | 83.7%       | 22009   | 98.7%     | 4914         | 79.4%       | 4830    | 98.3%     |

### Test 2: Procedure date range – use +/- 9 days

|      |           | Matching criteria |     |           |          | EVAR (n=26656) |             |         |           | OAR (n=6188) |             |         |           |
|------|-----------|-------------------|-----|-----------|----------|----------------|-------------|---------|-----------|--------------|-------------|---------|-----------|
| Step | Center ID | DOB               | sex | Proc date | Zip code | Cum match      | % Cum match | Cum Acc | % Cum Acc | Cum match    | % Cum match | Cum Acc | % Cum Acc |
| 2    | x         | x                 | x   | +/-0      |          | 23108          | 86.7%       | 22807   | 98.7%     | 5106         | 82.5%       | 5021    | 98.3%     |
| 3    | x         | x                 | x   | +/-3      |          | 23712          | 89.0%       | 23405   | 98.7%     | 5279         | 85.3%       | 5192    | 98.4%     |
| 3    | x         | x                 | x   | +/-5      |          | 23742          | 89.1%       | 23435   | 98.7%     | 5285         | 85.4%       | 5198    | 98.4%     |
| 3    | x         | x                 | x   | +/-9      |          | 23765          | 89.2%       | 23458   | 98.7%     | 5289         | 85.5%       | 5202    | 98.4%     |
| 3    | x         | x                 | x   | +/-15     |          | 23770          | 89.2%       | 23461   | 98.7%     | 5291         | 85.5%       | 5204    | 98.4%     |

### Test 3: Removing sex vs. no – remove sex in a step

|      |           | Matching criteria |     |           |          | EVAR (n=26656) |             |         |           | OAR (n=6188) |             |         |           |
|------|-----------|-------------------|-----|-----------|----------|----------------|-------------|---------|-----------|--------------|-------------|---------|-----------|
| Step | Center ID | DOB               | sex | Proc date | Zip code | Cum match      | % Cum match | Cum Acc | % Cum Acc | Cum match    | % Cum match | Cum Acc | % Cum Acc |
| 3    | x         | x                 | x   | +/-9      |          | 23765          | 89.2%       | 23458   | 98.7%     | 5289         | 85.5%       | 5202    | 98.4%     |
| 4    | x         | x                 |     | x         | 3 digit  | 23868          | 89.5%       | 23556   | 98.7%     | 5305         | 85.7%       | 5218    | 98.4%     |

### Test 4: Birth date range – use +/- 3 days

|      |           | Matching criteria |     |           |          | EVAR (n=26656) |             |         |           | OAR (n=6188) |             |         |           |
|------|-----------|-------------------|-----|-----------|----------|----------------|-------------|---------|-----------|--------------|-------------|---------|-----------|
| Step | Center ID | DOB               | sex | Proc date | Zip code | Cum match      | % Cum match | Cum Acc | % Cum Acc | Cum match    | % Cum match | Cum Acc | % Cum Acc |
| 5    | x         | +/-1              | x   | x         | 3 digit  | 23936          | 89.8%       | 23620   | 98.7%     | 5318         | 85.9%       | 5231    | 98.4%     |
| 5    | x         | +/-3              | x   | x         | 3 digit  | 23966          | 89.9%       | 23649   | 98.7%     | 5322         | 86.0%       | 5235    | 98.4%     |
| 5    | x         | +/-5              | x   | x         | 3 digit  | 23976          | 89.9%       | 23659   | 98.7%     | 5325         | 86.1%       | 5237    | 98.3%     |
